# Supplementary material for: Neurofeedback for Tinnitus Treatment – Review and Current Concepts
Source: PubMed Central journal article supplement (PMC5717031; doi:10.3389/fnagi.2017.00386), 2017-12-01
Supplement: Table_1.pdf [file Table_1.pdf]

*Supplementary Material*

**Neurofeedback for Tinnitus Treatment – Review and Current  
Concepts**

**Dominik Güntensperger, Christian Thüning, Martin Meyer, Patrick Neff, Tobias Kleinjung\***

\* **Correspondence:** Tobias Kleinjung: [tobias.kleinjung@usz.ch](mailto:tobias.kleinjung@usz.ch)

**Table 1**
**Summary of recent electrophysiological studies investigating chronic tinnitus**

| Reference                     | Study Design                     | Source Estimation, Connectivity              | Feature (Measurement)                                      | Analysis                                                                            | Findings                                                                                                                                                                                                                                                                                                                                                                                          |
|-------------------------------|----------------------------------|----------------------------------------------|------------------------------------------------------------|-------------------------------------------------------------------------------------|---------------------------------------------------------------------------------------------------------------------------------------------------------------------------------------------------------------------------------------------------------------------------------------------------------------------------------------------------------------------------------------------------|
| Adamchic et al. (2014a)       | Intervention (ACR)               | BESA (source montage)<br>Phase-amplitude CFC | Pitch                                                      | Responders with pitch change<br>(Vs. without)                                       | ↓ ACC ( $\theta$ phase) ↔ DLPFC ( $\gamma$ amplitude)<br>↓ ACC ( $\theta$ phase) ↔ AC ( $\gamma$ amplitude)                                                                                                                                                                                                                                                                                       |
| Adamchic et al. (2014b)       | Intervention (ACR)               | BESA (source montage)<br>sLORETA             | Distress (THI, VAS)                                        | Post- Vs. Pre-treatment                                                             | ↓ distress<br>↑ PAC ( $\alpha$ ) ↓ PAC ( $\beta, \gamma, \delta, \theta$ )                                                                                                                                                                                                                                                                                                                        |
| Adamchic et al. (2017)        | Intervention (ACR)               | BESA (source montage)<br>sLORETA             | Loudness (VAS)                                             | Post- Vs. Pre-treatment                                                             | ↓ loudness<br>↑ PAC ( $\alpha$ ) ↓ PAC ( $\beta, \gamma, \delta, \theta$ )                                                                                                                                                                                                                                                                                                                        |
| Balkenhol et al. (2013)       | RS EEG                           | none (mean power over all electrodes)        | Loudness (Matching)<br>Distress (TQ)<br>Hearing loss (PTA) | Correlation<br>Correlation<br>Correlation                                           | ↑ $\gamma$<br>↑ $\delta, \theta$<br>↓ $\gamma$                                                                                                                                                                                                                                                                                                                                                    |
| De Ridder and Vanneste (2014) | Intervention (EDS over AC)       | sLORETA<br>LPC                               | Loudness (VAS)                                             | Responders<br>(Vs. Non-Responders)                                                  | ↑ l pHC ( $\beta$ ) ↑ HC ( $\beta$ ) ↑ AMY ( $\beta$ ) ↑ l INS ( $\beta$ ) ↑ pHC ( $\gamma$ ) ↑ FPC ( $\gamma$ )<br>↑ l 2AC ↔ r pHC ( $\delta$ ) ↑ l 2AC ↔ r HC ↔ l pHC ( $\theta$ ) ↑ r PAC ↔ r pHC ( $\beta$ )<br>↑ pHC ↔ r PAC ↔ 2AC ( $\beta$ ) ↑ pHC ↔ r PAC ↔ l 2AC ( $\beta$ )                                                                                                             |
| De Ridder et al. (2011)       | RS EEG with ICA                  | sLORETA<br>LPC                               | Distress (TQ)                                              | Correlation                                                                         | ↑ Comp4 (sgACC, r IFG) ( $\alpha, \beta$ ) ↑ sgACC ↔ pHC ↔ OFC ↔ IFG ( $\alpha, \beta$ )                                                                                                                                                                                                                                                                                                          |
| De Ridder et al. (2013)       | Intervention (rTMS over r DLPFC) | sLORETA<br>LPC                               | Loudness (VAS)                                             | Responders<br>(Vs. Non-Responders)                                                  | ↑ r DLPFC ↔ l pHC ↔ l PAC ↔ l 2AC ( $\theta$ ) ↑ PAC ↔ ACC ↔ pHC ( $\theta$ )<br>↑ ACC ↔ r pHC ↔ PAC ↔ 2AC ( $\theta$ )                                                                                                                                                                                                                                                                           |
| De Ridder et al. (2015)       | RS EEG                           | sLORETA                                      | Loudness (NRS)<br>Loudness (matching)                      | Correlation<br>Correlation                                                          | ↑ l aINS ( $\alpha$ ) ↑ rACC ( $\beta$ ) ↑ dACC ( $\beta$ ) ↑ l pHC ( $\gamma$ ) ↑ PAC ( $\beta, \gamma$ )<br>none                                                                                                                                                                                                                                                                                |
| Joos et al. (2012)            | RS EEG                           | sLORETA                                      | Distress (NRS)<br>Depression (BDI)                         | Correlation<br>Correlation                                                          | ↑ r FPC ( $\alpha, \beta$ ) ↑ r OFC ( $\alpha, \beta$ ) ↑ sgACC ( $\beta$ )<br>↑ l FPC ( $\alpha$ ) ↑ l OFC ( $\alpha$ )                                                                                                                                                                                                                                                                          |
| Kim et al. (2016)             | Intervention (TRT)               | sLORETA<br>LPC                               | Distress (THI)<br>Loudness (NRS)<br>Awareness (NRS)        | Correlation (improvement)<br>Correlation (improvement)<br>Correlation (improvement) | ↑ l MFG ( $\theta$ ) ↑ l rACC ( $\theta$ ) ↑ r DLPFC ↑ l INS ( $\alpha$ ) ↑ r DLPFC ( $\alpha$ )<br>↑ l rACC ( $\alpha$ ) ↑ pgACC ( $\alpha$ ) ↑ l IFG ( $\alpha$ )<br>↓ r AC ( $\gamma, \delta$ ) ↓ pHC ( $\beta, \delta, \gamma$ )<br>↑ r rACC ( $\theta$ ) ↑ r DLPFC ( $\theta$ ) ↑ rACC ( $\alpha$ ) ↑ pgACC ( $\alpha$ ) ↑ r DLPFC ( $\alpha$ )<br>↑ l OFC ( $\gamma$ ) ↑ r MFG ( $\gamma$ ) |

|                         |                   |                                       |                                                                                                                                                                                                                                                                                                      |                                                                                          |                                                                                                                                                                                                                                                                                                                                                                                                                            |
|-------------------------|-------------------|---------------------------------------|------------------------------------------------------------------------------------------------------------------------------------------------------------------------------------------------------------------------------------------------------------------------------------------------------|------------------------------------------------------------------------------------------|----------------------------------------------------------------------------------------------------------------------------------------------------------------------------------------------------------------------------------------------------------------------------------------------------------------------------------------------------------------------------------------------------------------------------|
| Meyer et al. (2014)     | RS EEG            | None                                  | PCA:<br>Comp <i>Distress</i> (TQ, PRISM)<br>Comp <i>Presence</i> (Duration, Loudness (VAS))                                                                                                                                                                                                          | Correlation<br>Correlation                                                               | ↑ upper $\beta$ over frontal electrodes<br>↑ $\delta$ ↑ $\alpha$ ↓ $\gamma$ over temporal and l perisylvian electrodes                                                                                                                                                                                                                                                                                                     |
| Meyer et al. (2017)     | RS EEG            | sLORETA                               | Distress (TQ)<br>PCA:<br>Comp <i>Distress</i> (THI, TQ, PRISM)<br>Comp <i>Affective disorders, health and QOL</i> (BDI, BAI, SCL-K-9, SF-36, WHOQOL-BREF)                                                                                                                                            | Correlation<br>Correlation<br>Correlation                                                | ↑ IPL/SMG ( $\beta$ ) ↑ r pINS ( $\beta$ ) ↑ r PP ( $\beta$ ) ↑ r STG ( $\beta$ ) ↑ INS ( $\beta$ )<br>↑ INS ( $\beta$ )<br>none                                                                                                                                                                                                                                                                                           |
| Pierzycki et al. (2015) | RS EEG            | None (mean power over all electrodes) | Distress (THI, TFI, THQ)<br>QOL (WHOQOL-BREF)<br>Loudness (VAS)<br>PCA:<br>Comp <i>Tinnitus severity</i> (TFI, expect auditory subscale)<br>Comp <i>QOL</i> (WHOQOL-BREF, TFI- auditory subscale)<br>Comp <i>Hearing</i> (Duration, PTA, THQ- tinnitus and hearing subscale, TFI- auditory subscale) | Correlation<br>Correlation<br>Correlation<br>Correlation<br>Correlation<br>Correlation   | none<br>none<br>none<br>none<br>none<br>none                                                                                                                                                                                                                                                                                                                                                                               |
| Schlee et al. (2014)    | RS MEG            | None                                  | Duration                                                                                                                                                                                                                                                                                             | Correlation                                                                              | ↓ $\alpha$ variability over temporal sensors                                                                                                                                                                                                                                                                                                                                                                               |
| Song et al. (2013a)     | RS EEG            | sLORETA<br>LPC                        | Age of Onset                                                                                                                                                                                                                                                                                         | Late (~ 52y) Vs. early onset (~ 29y)                                                     | ↑ r OFC ( $\gamma$ ) ↑ l DLPFC ( $\beta$ ) ↑ r SMA ( $\beta$ ) ↑ r SFG ( $\beta$ ) ↑ r dACC ( $\beta$ )<br>↓ PCC ( $\delta$ ) ↓ r dPMC ( $\theta$ )<br>↑ PAC ↔ 2AC ( $\theta$ ) ↑ l INS ↔ r INS ( $\alpha$ ) ↑ l INS ↔ r sgACC ( $\alpha$ )<br>↑ r 2AC ↔ l PrC ↔ r PrC ( $\alpha$ )                                                                                                                                        |
| Song et al. (2013b)     | Intervention (CI) | sLORETA<br>LPC                        | Loudness (NRS)<br>Distress (TQ)                                                                                                                                                                                                                                                                      | Slight (Vs. marked) improvement<br>Slight (Vs. marked) improvement                       | ↑ l 2AC ( $\delta, \gamma$ ) ↑ l TP ( $\beta$ ) ↑ l PAC ↔ r PCC ( $\delta$ )<br>↑ l PAC ↔ r PAC ( $\gamma$ ) ↑ r PAC ↔ l pHC ( $\gamma$ ) ↑ r OFC ↔ l PrC ( $\gamma$ )                                                                                                                                                                                                                                                     |
| Song et al. (2013c)     | RS EEG            | sLORETA<br>LPC                        | Age of onset<br><br>Distress (TQ)                                                                                                                                                                                                                                                                    | Late (~ 52y) Vs. early onset (~ 29y)<br><br>High (TQ: 47-84) Vs. low distress (TQ: 0-46) | ↑ dACC ( $\beta$ ) ↑ sgACC ( $\beta$ ) ↑ pHC( $\beta$ ) ↑ r pgACC ( $\gamma$ ) ↑ DLPFC ( $\gamma$ )<br>↑ r sgACC ↔ l PAC ( $\gamma$ ) ↑ r MTG ↔ PAC ( $\gamma$ ) ↑ r PCC ↔ PrC ( $\gamma$ )<br>↓ r PAC ↔ r PCC ↔ PrC ( $\alpha$ ) ↓ r PAC ↔ l PrC ( $\beta$ )<br>↑ dACC ( $\beta$ ) ↑ pgACC ( $\gamma$ ) for late-onset<br>↑ l OFC ( $\beta, \gamma, \delta$ ) ↑ l SMG ( $\alpha$ ) ↑ l DLPFC ( $\gamma$ ) for early-onset |
| Song et al. (2014)      | RS EEG            | sLORETA<br>LPC                        | Hyperacusis (HQ)                                                                                                                                                                                                                                                                                     | With Hyperacusis (Vs. without)<br>Correlation                                            | ↑ SMA ( $\beta$ ) ↑ dPMC ( $\beta$ ) ↑ dACC ( $\beta$ ) ↑ OFC ( $\beta$ ) ↑ r AC ( $\alpha$ )<br>↑ r 2AC ↔ r PAC ↔ r PFC ↔ l sgACC ↑ l PAC ↔ l PCC<br>↑ OFC ( $\beta$ ) ↑ r AC ( $\alpha$ ) ↑ dACC ( $\beta$ )                                                                                                                                                                                                             |

## Supplementary Material

|                               |                                |                                     |                                  |                                                                                                                                                                                  |                                                                                                                                                                                                                                                                                                                                                                                                                                                                                                                                                                                                                                                                                                                                                        |
|-------------------------------|--------------------------------|-------------------------------------|----------------------------------|----------------------------------------------------------------------------------------------------------------------------------------------------------------------------------|--------------------------------------------------------------------------------------------------------------------------------------------------------------------------------------------------------------------------------------------------------------------------------------------------------------------------------------------------------------------------------------------------------------------------------------------------------------------------------------------------------------------------------------------------------------------------------------------------------------------------------------------------------------------------------------------------------------------------------------------------------|
| Song et al. (2015)            | RS EEG                         | sLORETA<br>LPC                      | Awareness (%)                    | Correlation                                                                                                                                                                      | ↓ l dACC ( $\delta$ ) ↓ l pgACC ( $\beta, \delta$ ) ↓ pgACC ( $\theta$ ) ↓ rACC ( $\beta, \delta, \theta$ ) ↓ sgACC ( $\theta$ )<br>↓ l PAC ↔ rACC ( $\beta$ ) ↓ l PAC ↔ sgACC ( $\beta$ )                                                                                                                                                                                                                                                                                                                                                                                                                                                                                                                                                             |
| Tass et al. (2012)            | Intervention (ACR)             | BESA (source montage)<br>sLORETA    | Loudness (VAS)<br>Distress (TQ)  | Post- Vs. Pre-treatment                                                                                                                                                          | ↓ loudness, distress<br>↑ PAC ( $\alpha$ ) ↓ PAC ( $\beta, \gamma, \delta, \theta$ )                                                                                                                                                                                                                                                                                                                                                                                                                                                                                                                                                                                                                                                                   |
| van der Loo et al. (2009)     | RS EEG                         | LORETA                              | Loudness (VAS)                   | Correlation                                                                                                                                                                      | ↑ contralateral PAC ( $\gamma$ )                                                                                                                                                                                                                                                                                                                                                                                                                                                                                                                                                                                                                                                                                                                       |
| van der Loo et al. (2011)     | RS EEG                         | sLORETA<br>LPC                      | Distress (TQ)                    | Correlation                                                                                                                                                                      | ↑ l aINS ( $\alpha$ ), r aINS ( $\gamma, \delta$ )<br>↓ l aINS ( $\gamma, \theta$ )                                                                                                                                                                                                                                                                                                                                                                                                                                                                                                                                                                                                                                                                    |
| Vanneste and De Ridder (2011) | Intervention (tDCS over DLPFC) | sLORETA<br>LPC                      | Distress (VAS)<br>Loudness (VAS) | Post- Vs. Pre-treatment                                                                                                                                                          | ↓ loudness, distress<br>↑ pgACC ( $\alpha$ ) ↓ r PAC ( $\beta, \gamma$ ), iPSC ( $\beta, \gamma$ )<br>↑ r DLPFC ↔ pHC ( $\theta$ ) ↑ r PAC ↔ l pHC ↔ DLPFC ↔ pgACC ( $\theta$ )<br>↓ DLPFC ↔ pgACC ↔ r PAC ↔ pHC ( $\gamma$ )<br>↓ l DLPFC ↔ l pHC ↔ pgACC ( $\gamma$ ) ↓ r PAC ↔ r pHC ↔ pgACC ( $\gamma$ )                                                                                                                                                                                                                                                                                                                                                                                                                                           |
| Vanneste and De Ridder (2012) | Intervention (alcohol)         | sLORETA                             | Loudness (VAS)<br>Distress (VAS) | Post- Vs. Pre-treatment                                                                                                                                                          | ↓ distress, loudness<br>↑ PCC ( $\alpha$ ) ↑ pgACC ( $\beta$ ) ↑ dACC ( $\beta$ ) ↑ l INS ( $\beta$ )<br>↓ OFC ( $\alpha$ ) ↓ VLPFC ( $\alpha$ ) ↓ scACC ( $\alpha$ ) ↓ PrC ( $\beta$ ) ↓ PrC ( $\gamma$ ) ↓ PCC ( $\gamma$ )                                                                                                                                                                                                                                                                                                                                                                                                                                                                                                                          |
| Vanneste and De Ridder (2013) | RS EEG                         | sLORETA                             | Distress (TQ)                    | Correlation                                                                                                                                                                      | ↑ pgACC ( $\alpha$ ) ↑ sgACC ( $\alpha$ )                                                                                                                                                                                                                                                                                                                                                                                                                                                                                                                                                                                                                                                                                                              |
| Vanneste and De Ridder (2015) | RS EEG                         | sLORETA<br>LPC                      | Loudness (NRS)<br>Distress (TQ)  | Correlation<br>Correlation                                                                                                                                                       | ↑ AC ( $\beta, \gamma$ )<br>↑ sgACC ( $\alpha, \beta$ ) ↑ dACC ( $\alpha, \beta$ ), ↑ PCC ( $\alpha, \beta$ )<br>↑ PAC ↔ sgACC ↔ d ACC ↔ PCC ( $\alpha, \beta$ )                                                                                                                                                                                                                                                                                                                                                                                                                                                                                                                                                                                       |
| Vanneste and De Ridder (2016) | RS EEG                         | sLORETA<br>LPC<br>Granger causality | Hearing loss (PTA)               | Low hearing loss Vs. Controls<br>High hearing loss Vs. Controls<br>High Vs. low hearing loss<br>Mean hearing loss<br>Range of hearing loss<br>Hearing loss at tinnitus frequency | ↑ l aMTG( $\theta$ ); ↑ l PAC ↔ r PAC ( $\gamma$ )<br>↑ pHC ( $\theta$ ); ↑ l PAC ↔ r PAC ( $\alpha, \theta$ ) ↑ l pHC ↔ r pHC ( $\alpha, \theta$ );<br>↑ l pHC → l PAC ( $\theta$ )<br>↓ l aMTG ( $\gamma$ ); ↑ l PAC ↔ r PAC ↑ l pHC ↔ r pHC ( $\alpha, \theta$ )<br>↓ l pHC → l PAC ( $\theta$ )<br>↑ pHC ( $\theta$ ) ↑ r pHC ( $\alpha$ ); ↑ l pHC ↔ r pHC ↔ l PAC ( $\alpha$ )<br>↑ l pHC ↔ l PAC ↔ r PAC ( $\theta$ ) ↑ r pHC ↔ l PAC ( $\theta$ ); ↑ l pHC → l PAC ( $\theta$ )<br>↑ pHC ( $\alpha, \theta$ ); ↑ l pHC ↔ l PAC ↔ r PAC ( $\alpha, \theta$ )<br>↑ l pHC ↔ r pHC ↔ r PAC ( $\alpha$ ); ↑ l pHC → l PAC ( $\theta$ )<br>↑ l pHC ↔ l PAC ↔ r PAC ( $\theta$ ) ↑ r pHC ↔ l PAC ↔ r PAC ( $\theta$ )<br>↑ l pHC → l PAC ( $\theta$ ) |

|                         |                                |                |                                                                     |                                                                                              |                                                                                                                                                                                                                                                                   |
|-------------------------|--------------------------------|----------------|---------------------------------------------------------------------|----------------------------------------------------------------------------------------------|-------------------------------------------------------------------------------------------------------------------------------------------------------------------------------------------------------------------------------------------------------------------|
| Vanneste et al. (2010a) | RS EEG                         | LORETA         | Distress (TQ)                                                       | High Vs. low distress                                                                        | ↑ scACC ( $\alpha$ ) ↑ INS ( $\alpha$ ) ↑ pHC ( $\alpha$ ) ↑ AMY ( $\alpha$ )<br>↓ PCC ( $\alpha$ ) ↓ PrC ( $\alpha$ ) ↓ DLPFC ( $\alpha$ )                                                                                                                       |
|                         |                                |                |                                                                     | High distress Vs. controls                                                                   | ↑ dACC ( $\alpha,\beta$ ) ↓ dACC ( $\delta,\theta$ )                                                                                                                                                                                                              |
| Vanneste et al. (2010b) | RS EEG                         | sLORETA        | Type                                                                | Narrow-band noise (Vs. pure tone) tinnitus                                                   | ↑ PCC ( $\beta$ ) ↑ r HC ( $\beta$ ) ↑ r pHC ( $\gamma$ )<br>↓ r IFPC ( $\delta$ )                                                                                                                                                                                |
| Vanneste et al. (2011a) | Intervention (tDCS over DLPFC) | sLORETA<br>LPC | Distress (VAS)<br>Loudness (VAS)                                    | Responders (Vs. Non-Responders)                                                              | ↑ r PAC ( $\gamma$ ) ↑ r 2AC ( $\gamma$ ) ↑ pHC ( $\gamma$ )<br>↑ r DLPFC ↔ r pHC ( $\gamma$ ) ↑ r DLPFC ↔ sgACC ( $\gamma$ )                                                                                                                                     |
| Vanneste et al. (2011b) | RS EEG                         | sLORETA        | Location                                                            | Unilateral (Vs. bilateral) tinnitus<br>Bilateral (Vs. Controls)<br>Unilateral (Vs. Controls) | ↑ VLPFC ( $\delta$ ) ↑ pHC ( $\beta,\gamma$ ) ↑ AG ( $\beta,\gamma$ ) ↑ AC ( $\beta,\gamma$ ) ↓ sPMC ( $\beta$ )<br>↑ VLPFC ( $\beta$ ) ↑ FPC ( $\beta$ ) ↑ sPMC ( $\gamma$ )<br>↑ r sPMC( $\gamma$ )                                                             |
| Vanneste et al. (2011c) | RS EEG                         | sLORETA        | Location                                                            | Left- and right-sided tinnitus                                                               | ↑ contralateral pHC ( $\gamma$ )                                                                                                                                                                                                                                  |
| Vanneste et al. (2011d) | RS EEG                         | sLORETA<br>LPC | Duration                                                            | Recent onset (Vs. chronic => 4 years) tinnitus                                               | ↑ SMA ( $\theta$ ) ↑ dACC ( $\beta$ ) ↑ INS ( $\beta$ ) ↑ PAC ( $\gamma$ ) ↑ 2AC ( $\gamma$ )<br>↑ l pHC ↔ l PAC ↔ l 2AC ↔ l INS ↔ r DLPFC ( $\gamma$ )<br>↓ connectivity in general ( $\alpha,\gamma,\theta$ )                                                   |
| Vanneste et al. (2012)  | RS EEG                         | sLORETA<br>LPC | Gender                                                              | Females (Vs. Males)                                                                          | ↑ OFC ( $\beta$ ) ↑ FPC ( $\beta$ )<br>↑ OFC ↔ INS ↔ sgACC ↔ pHC ↔ PAC ↔ 2AC ( $\alpha$ )                                                                                                                                                                         |
| Vanneste et al. (2013)  | Intervention (music)           | sLORETA        | Depression (HADS)<br>Loudness (VAS)<br>Annoyance (VAS)              | Post- Vs. Pre-treatment (group with music to overcompensate hearing loss)                    | ↑ loudness, annoyance, depressive feelings<br>↑ l dACC ( $\alpha$ ) ↑ l pgACC ( $\beta$ ) ↑ PAC ( $\gamma$ )                                                                                                                                                      |
| Vanneste et al. (2014a) | RS EEG with ICA                | sLORETA<br>LPC | Distress (TQ)                                                       | Correlation                                                                                  | ↓ Comp1 (PCC, PrC) ( $\alpha,\beta$ ) ↓ Comp2 (PCC, PrC, IPL, pHC) ( $\alpha,\beta,\gamma$ )<br>↑ Comp4 (pgACC, sgACC, VMPFC, INS) ( $\alpha$ )<br>↑ Comp6 (dACC, SMA, sgACC, VMPFC, MFG) ( $\beta$ )<br>Comp1 ↔ Comp2 ↔ Comp4 ↔ Comp6 ( $\alpha,\delta,\theta$ ) |
|                         |                                |                | Loudness (VAS)                                                      | Correlation                                                                                  | ↓ Comp3 (rsPCC, LG, pHC) ( $\beta$ )<br>↑ Comp5 (sgACC, VMPFC, HC, AMY, MFG) ( $\beta$ )<br>Comp3 ↔ Comp5 ( $\gamma$ )                                                                                                                                            |
| Vanneste et al. (2014b) | RS EEG                         | sLORETA<br>LPC | Coping style<br>Distress (TQ)<br>Loudness (VAS)<br>Depression (BDI) | Maladaptive coping (Vs. adaptive coping)<br>Correlations                                     | ↑ loudness, distress, depression<br>↑ l DLPFC ( $\alpha$ ) ↑ sgACC ( $\alpha$ ); ↑ connectivity in default mode network<br>↑ DLPFC ( $\alpha$ ) for maladaptive coping<br>↑ sgACC ( $\alpha$ ) for distress and depression                                        |
| Vanneste et al. (2016)  | RS EEG                         | sLORETA        | Cognition                                                           | Correlation                                                                                  | ↑ HC ( $\beta$ ) ↑ pgACC ( $\beta$ ) ↑ sgACC ( $\beta$ ) ↑ r INS ( $\beta$ )                                                                                                                                                                                      |

Note: ↑, increase / positive correlation; ↓, decrease / negative correlation; ↔, functional connectivity between x and y; →, effective connectivity from x to y; l, left; r, right; 2AC, secondary auditory cortex; AC, auditory cortex; ACC, anterior cingulate cortex; ACR, acoustic coordinated reset; AG, angular gyrus; aINS, anterior insula; aMTG, anterior middle temporal gyrus; AMY, amygdala; BAI, Beck's Anxiety Inventory (Beck et al., 1988); BDI, Beck's Depression Inventory (Beck et al., 1961); CFC, cross-frequency coupling; CI, cochlear implantation; Comp, Component; dACC, dorsal anterior cingulate cortex; DLPFC, dorsolateral prefrontal cortex; dPMC, dorsal premotor cortex; EDS, extradural stimulation; FPC, frontopolar cortex; HC, hippocampus; ICA, independent component analysis; IFG, inferior frontal gyrus; INS, insula; IPL, inferior parietal lobule; iPSC, inferior primary somatosensory cortex; lFPC, lateral frontopolar cortex; LG, lingual gyrus; LPC, lagged phase coherence; MFG, middle frontal gyrus; MTG, middle temporal gyrus; NRS, numeric rating scale; OFC, orbitofrontal cortex; PAC, primary auditory cortex; PCA, principal component analysis; PCC, posterior cingulate cortex; PFC, prefrontal cortex; pgACC, pregenual anterior cingulate cortex; pHC, parahippocampus; pINS, posterior insula; PMC, premotor cortex; PP, planum parietale; PrC, precuneus; PRISM, Pictorial Representation of Illness and Self-Measure (Büchi et al., 1998); PTA, pure tone audiometry; QOL, quality of life; rACC, rostral anterior cingulate cortex; RS, resting-state; rsPCC, retrosplenial posterior cingulate cortex; rTMS, repetitive transcranial magnetic stimulation; scACC, subcallosal anterior cingulate cortex; SCL-K-9, Symptom Check List short form (Klaghofer and Brahler, 2001); SF-36, Short Form Health Survey (Ware Jr and Sherbourne, 1992); SFG, superior frontal gyrus; sgACC, subgenual anterior cingulate cortex; SMA, supplementary motor area; SMG, supramarginal gyrus; sPMC, superior premotor cortex; STG, superior temporal gyrus; TC, temporal cortex; tDCS, transcranial direct-current stimulation; TF, Tinnitus Functional Index (Meikle et al., 2012); THI, Tinnitus Handicap Questionnaire (Newman et al., 1996); THQ, Tinnitus Handicap Questionnaire (Kuk et al., 1990); TP, temporal pole; TQ, Tinnitus Questionnaire (Goebel and Hiller, 1994); TRT, tinnitus retraining therapy; VAS, visual analogue scale; VMPFC, ventromedial prefrontal cortex; WHOQOL-BREF, World Health Organization Quality of Life assessment (short form).

## References

- Adamchic, I., Langguth, B., Hauptmann, C., and Tass, P. A. (2014a). Abnormal cross-frequency coupling in the tinnitus network. *Frontiers in neuroscience* 8. doi: 10.3389/fnins.2014.00284.
- Adamchic, I., Toth, T., Hauptmann, C., and Tass, P. A. (2014b). Reversing pathologically increased EEG power by acoustic coordinated reset neuromodulation. *Hum. Brain Mapp.* 35, 2099–2118. doi: 10.1002/hbm.22314.
- Adamchic, I., Toth, T., Hauptmann, C., Walger, M., Langguth, B., Klingmann, I., and Tass, P. A. (2017). Acute effects and after-effects of acoustic coordinated reset neuromodulation in patients with chronic subjective tinnitus. *NeuroImage. Clinical* 15, 541–558. doi: 10.1016/j.nicl.2017.05.017.
- Balkenhol, T., Wallhäuser-Franke, E., and Delb, W. (2013). Psychoacoustic tinnitus loudness and tinnitus-related distress show different associations with oscillatory brain activity. *PLoS ONE* 8, e53180. doi: 10.1371/journal.pone.0053180.
- Beck, A. T., Epstein, N., Brown, G., and Steer, R. A. (1988). An inventory for measuring clinical anxiety. Psychometric properties. *Journal of Consulting and Clinical Psychology* 56, 893–897.
- Beck, A. T., Ward, C. H., Mendelson, M., Mock, J., and Erbaugh, J. (1961). An inventory for measuring depression. *Archives of general psychiatry* 4, 561–571.
- Büchi, S., Sensky, T., Sharpe, L., and Timberlake, N. (1998). Graphic representation of illness. A novel method of measuring patients' perceptions of the impact of illness. *Psychotherapy and psychosomatics* 67, 222–225.
- De Ridder, D., Congedo, M., and Vanneste, S. (2015). The neural correlates of subjectively perceived and passively matched loudness perception in auditory phantom perception. *Brain and behavior* 5, e00331. doi: 10.1002/brb3.331.
- De Ridder, D., Song, J.-J., and Vanneste, S. (2013). Frontal cortex TMS for tinnitus. *Brain Stimulation* 6, 355–362. doi: 10.1016/j.brs.2012.07.002.
- De Ridder, D., and Vanneste, S. (2014). Targeting the Parahippocampal Area by Auditory Cortex Stimulation in Tinnitus. *Brain Stimulation* 7, 709–717. doi: 10.1016/j.brs.2014.04.004.
- De Ridder, D., Vanneste, S., Congedo, M., and Koenig, T. (2011). The Distressed Brain. A Group Blind Source Separation Analysis on Tinnitus. *PLoS ONE* 6, e24273. doi: 10.1371/journal.pone.0024273.
- Goebel, G., and Hiller, W. (1994). Tinnitus-Fragebogen (TF). Standardinstrument zur Graduierung des Tinnitussschweregrades. Ergebnisse einer Multicenterstudie mit dem Tinnitus-Fragebogen (TF) [The tinnitus questionnaire. A standard instrument for grading the degree of tinnitus. Results of a multicenter study with the tinnitus questionnaire]. *HNO* 42, 166–172.
- Joos, K., Vanneste, S., and De Ridder, D. (2012). Disentangling Depression and Distress Networks in the Tinnitus Brain. *PLoS ONE* 7, e40544. doi: 10.1371/journal.pone.0040544.g001.

- Kim, S. H., Jang, J. H., Lee, S.-Y., Han, J. J., Koo, J.-W., Vanneste, S., De Ridder, D., and Song, J.-J. (2016). Neural substrates predicting short-term improvement of tinnitus loudness and distress after modified tinnitus retraining therapy. *Scientific reports* 6, 29140. doi: 10.1038/srep29140.
- Klaghofer, R., and Brahler, E. (2001). Construction and statistical testing of a short version of the SCL-90-R. *Zeitschrift Für Klinische Psychologie Psychiatrie Und Psychotherapie* 49, 115–124.
- Kuk, F. K., Tyler, R. S., Russell, D., and Jordan, H. (1990). The psychometric properties of a tinnitus handicap questionnaire. *Ear and hearing* 11, 434–445.
- Meikle, M. B., Henry, J. A., Griest, S. E., Stewart, B. J., Abrams, H. B., McArdle, R., Myers, P. J. et al. (2012). The tinnitus functional index. Development of a new clinical measure for chronic, intrusive tinnitus. *Ear and hearing* 33, 153–176. doi: 10.1097/AUD.0b013e31822f67c0.
- Meyer, M., Luethi, M. S., Neff, P., Langer, N., and Büchi, S. (2014). Disentangling Tinnitus Distress and Tinnitus Presence by Means of EEG Power Analysis. *Neural Plast.* 2014, 1–13. doi: 10.1155/2014/468546.
- Meyer, M., Neff, P., Grest, A., Hemsley, C., Weidt, S., and Kleinjung, T. (2017). EEG oscillatory power dissociates between distress- and depression-related psychopathology in subjective tinnitus. *Brain Research* 1663, 194–204. doi: 10.1016/j.brainres.2017.03.007.
- Newman, C. W., Jacobson, G. P., and Spitzer, J. B. (1996). Development of the Tinnitus Handicap Inventory. *Archives of otolaryngology--head & neck surgery* 122, 143–148.
- Pierzycki, R. H., McNamara, A. J., Hoare, D. J., and Hall, D. A. (2015). Whole scalp resting state EEG of oscillatory brain activity shows no parametric relationship with psychoacoustic and psychosocial assessment of tinnitus: A repeated measures study. *Hear. Res.* 331, 101–108. doi: 10.1016/j.heares.2015.11.003.
- Schlee, W., Schecklmann, M., Lehner, A., Kreuzer, P. M., Vielsmeier, V., Poepl, T. B., and Langguth, B. (2014). Reduced variability of auditory alpha activity in chronic tinnitus. *Neural Plast.* 2014, 436146. doi: 10.1155/2014/436146.
- Song, J.-J., De Ridder, D., Schlee, W., van de Heyning, P., and Vanneste, S. (2013a). “Distressed aging”: the differences in brain activity between early- and late-onset tinnitus. *Neurobiology of Aging* 34, 1853–1863. doi: 10.1016/j.neurobiolaging.2013.01.014.
- Song, J.-J., De Ridder, D., Weisz, N., Schlee, W., van de Heyning, P., and Vanneste, S. (2014). Hyperacusis-associated pathological resting-state brain oscillations in the tinnitus brain: a hyperresponsiveness network with paradoxically inactive auditory cortex. *Brain Struct Funct* 219, 1113–1128. doi: 10.1007/s00429-013-0555-1.
- Song, J.-J., Punte, A. K., De Ridder, D., Vanneste, S., and van de Heyning, P. (2013b). Neural substrates predicting improvement of tinnitus after cochlear implantation in patients with single-sided deafness. *Hear. Res.* 299, 1–9. doi: 10.1016/j.heares.2013.02.001.
- Song, J.-J., Vanneste, S., and De Ridder, D. (2015). Dysfunctional noise cancelling of the rostral anterior cingulate cortex in tinnitus patients. *PLoS ONE* 10, e0123538. doi: 10.1371/journal.pone.0123538.



- Song, J.-J., Vanneste, S., Schlee, W., van de Heyning, P., and De Ridder, D. (2013c). Onset-related differences in neural substrates of tinnitus-related distress: the anterior cingulate cortex in late-onset tinnitus, and the frontal cortex in early-onset tinnitus. *Brain Struct Funct.* doi: 10.1007/s00429-013-0648-x.
- Tass, P. A., Adamchic, I., Freund, H.-J., Stackelber, T. von, and Hauptmann, C. (2012). Counteracting tinnitus by acoustic coordinated reset neuromodulation. *Restor. Neurol. Neurosci.* 30, 137–159.
- van der Loo, E., Congedo, M., Vanneste, S., van Heyning, P. de, and de Ridder, D. (2011). Insular lateralization in tinnitus distress. *Autonomic Neuroscience* 165, 191–194. doi: 10.1016/j.autneu.2011.06.007.
- van der Loo, E., Gais, S., Congedo, M., Vanneste, S., Plazier, M., Menovsky, T., van de Heyning, P., De Ridder, D., and Greenlee, M. W. (2009). Tinnitus Intensity Dependent Gamma Oscillations of the Contralateral Auditory Cortex. *PLoS ONE* 4, e7396. doi: 10.1371/journal.pone.0007396.
- Vanneste, S., Congedo, M., and de Ridder, D. (2014a). Pinpointing a Highly Specific Pathological Functional Connection That Turns Phantom Sound into Distress. *Cerebral Cortex* 24, 2268–2282. doi: 10.1093/cercor/bht068.
- Vanneste, S., and De Ridder, D. (2011). Bifrontal transcranial direct current stimulation modulates tinnitus intensity and tinnitus-distress-related brain activity. *The European journal of neuroscience* 34, 605–614. doi: 10.1111/j.1460-9568.2011.07778.x.
- Vanneste, S., and De Ridder, D. (2012). The use of alcohol as a moderator for tinnitus-related distress. *Brain Topogr* 25, 97–105. doi: 10.1007/s10548-011-0191-0.
- Vanneste, S., and De Ridder, D. (2013). Brain areas controlling heart rate variability in tinnitus and tinnitus-related distress. *PLoS ONE* 8, e59728. doi: 10.1371/journal.pone.0059728.
- Vanneste, S., and De Ridder, D. (2015). Stress-Related Functional Connectivity Changes Between Auditory Cortex and Cingulate in Tinnitus. *Brain connectivity* 5, 371–383. doi: 10.1089/brain.2014.0255.
- Vanneste, S., and De Ridder, D. (2016). Deafferentation-based pathophysiological differences in phantom sound: Tinnitus with and without hearing loss. *Neuroimage.* doi: 10.1016/j.neuroimage.2015.12.002.
- Vanneste, S., Faber, M., Langguth, B., and De Ridder, D. (2016). The neural correlates of cognitive dysfunction in phantom sounds. *Brain Research.* doi: 10.1016/j.brainres.2016.03.016.
- Vanneste, S., Focquaert, F., van de Heyning, P., and De Ridder, D. (2011 a). Different resting state brain activity and functional connectivity in patients who respond and not respond to bifrontal tDCS for tinnitus suppression. *Experimental brain research* 210, 217–227. doi: 10.1007/s00221-011-2617-z.
- Vanneste, S., Joos, K., and De Ridder, D. (2012). Prefrontal cortex based sex differences in tinnitus perception. Same tinnitus intensity, same tinnitus distress, different mood. *PLoS ONE* 7, e31182. doi: 10.1371/journal.pone.0031182.

- Vanneste, S., Joos, K., Langguth, B., To, W. T., and De Ridder, D. (2014b). Neuronal correlates of maladaptive coping. An EEG-study in tinnitus patients. *PLoS ONE* 9, e88253. doi: 10.1371/journal.pone.0088253.
- Vanneste, S., Plazier, M., van der Loo, E., van de Heyning, P., Congedo, M., and De Ridder, D. (2010a). The neural correlates of tinnitus-related distress. *Neuroimage* 52, 470–480.
- Vanneste, S., Plazier, M., van der Loo, E., van de Heyning, P., and De Ridder, D. (2010b). The differences in brain activity between narrow band noise and pure tone tinnitus. *PLoS ONE* 5, e13618. doi: 10.1371/journal.pone.0013618.
- Vanneste, S., Plazier, M., van der Loo, E., van de Heyning, P., and De Ridder, D. (2011b). The difference between uni- and bilateral auditory phantom percept. *Clinical neurophysiology : official journal of the International Federation of Clinical Neurophysiology* 122, 578–587. doi: 10.1016/j.clinph.2010.07.022.
- Vanneste, S., van de Heyning, P., and de Ridder, D. (2011c). Contralateral parahippocampal gamma-band activity determines noise-like tinnitus laterality: a region of interest analysis. *Neuroscience* 199, 481–490. doi: 10.1016/j.neuroscience.2011.07.067.
- Vanneste, S., van de Heyning, P., and De Ridder, D. (2011d). The neural network of phantom sound changes over time. A comparison between recent-onset and chronic tinnitus patients. *European Journal of Neuroscience* 34, 718–731. doi: 10.1111/j.1460-9568.2011.07793.x.
- Vanneste, S., van Dongen, M., Vree, B. de, Hiseni, S., van der Velden, E., Strydis, C., Joos, K., Noreña, A. J., Serdijn, W., and De Ridder, D. (2013). Does enriched acoustic environment in humans abolish chronic tinnitus clinically and electrophysiologically? A double blind placebo controlled study. *Hear. Res.* 296, 141–148. doi: 10.1016/j.heares.2012.10.003.
- Ware Jr, J. E., and Sherbourne, C. D. (1992). The MOS 36-item short-form health survey. I. Conceptual framework and item selection. *Medical care*, 473–483.
